# Supplementary material for: Bone Mineral Density and Current Bone Health Screening Practices in Friedreich’s Ataxia
Source: PubMed Central journal article supplement (PMC8964400; doi:10.3389/fnins.2022.818750), 2022-03-14
Supplement: Data_Sheet_2.pdf [file Data_Sheet_2.pdf]

# Introduction and Fracture history

Please move from one survey to the next. If you do not have diabetes, there will be instructions when to stop. If you have diabetes, we ask that you complete the entirety of the survey.

Thank you for completing this survey!

Participant ID number

\_\_\_\_\_

Name (First name Last name)

\_\_\_\_\_

Date of Birth

\_\_\_\_\_

What is your gender?

- Male  
 Female  
 Transgender  
 Other  
 Prefer not to say

Who is completing this survey?

- Self  
 Self with caregiver  
 Parent  
 Spouse  
 Other caregiver

What is your most recent weight?  
(in pounds)

\_\_\_\_\_

When was this weight checked?

- At a doctor's visit in the last year  
 At a doctor's visit more than a year ago  
 At home  
 Other

What is your most recent height?  
(in inches)

\_\_\_\_\_

When was this height measured?

- At a doctor's visit in the last year  
 At a doctor's visit more than a year ago  
 At home  
 Other

## If you use a walking device, what do you use?

|                  | Cane                  | 2 cane/<br>crutches<br>(Canadian<br>Crutches) | Walker                | Canine<br>Assistance<br>(Service<br>Dog) | Wheelchair            | Other                 | None                  |
|------------------|-----------------------|-----------------------------------------------|-----------------------|------------------------------------------|-----------------------|-----------------------|-----------------------|
| Primary Device   | <input type="radio"/> | <input type="radio"/>                         | <input type="radio"/> | <input type="radio"/>                    | <input type="radio"/> | <input type="radio"/> | <input type="radio"/> |
| Secondary device | <input type="radio"/> | <input type="radio"/>                         | <input type="radio"/> | <input type="radio"/>                    | <input type="radio"/> | <input type="radio"/> | <input type="radio"/> |

What age did you start using your primary walking device?

\_\_\_\_\_

---

What age did you start using your secondary walking device? \_\_\_\_\_

---

If you use an alternate walking device, what is it? \_\_\_\_\_

---

Have you ever fractured (broken) a bone?

- Yes  
 No
- 

If yes, how many bones have you broken?

- 1  
 2  
 3  
 4  
 5  
 more than 5
- 

What is one bone that you have broken?  
(There will be separate questions for each broken bone)

- Face/Skull  
 Rib/Sternum  
 Collarbone (Clavicle)  
 Arm (including upper arm, elbow, lower arm, wrist)  
 Hand  
 Fingers or Toes  
 Hip/Pelvis  
 Thigh  
 Lower leg, ankle, foot  
 Spine (Vertebrae)  
 Other  
 Unknown
- 

If you broke a different bone than listed, please list: \_\_\_\_\_

---

How old were you when you broke this bone (years)? \_\_\_\_\_

---

How did you break this bone?

- Fall (please choose this for any type of fall and there will be a question with additional details below)  
 High impact injury (example: motor vehicle accident)  
 During activity (examples: bicycling, skateboarding, playing a sport)  
 Injury unknown (incidentally detected fracture)  
 Other
- 

If you broke it an alternate way, how did you break this bone? \_\_\_\_\_

---

If you broke your bone from a fall, how high was it from?

- Above standing height (greater than 6 inches above standing)  
 Standing height (within 5-6 inches from where head would be standing)  
 Less than standing height (over 6 inches below where head would be if standing)

---

What is another bone that you have broken?  
(There will be separate questions for each broken bone)

- Face/Skull
- Rib/Sternum
- Collarbone (Clavicle)
- Arm (including upper arm, elbow, lower arm, wrist)
- Hand
- Fingers or Toes
- Hip/Pelvis
- Thigh
- Lower leg, ankle, foot
- Spine (Vertebrae)
- Other
- Unknown

---

If you broke a different bone than listed, please list: \_\_\_\_\_

---

How old were you when you broke this bone (years)? \_\_\_\_\_

---

How did you break this bone?

- Fall (please choose this for any type of fall and there will be a question with additional details below)
- High impact injury (example: motor vehicle accident)
- During activity (examples: bicycling, skateboarding, playing a sport)
- Injury unknown (incidentally detected fracture)
- Other

---

If you broke it an alternate way, how did you break this bone? \_\_\_\_\_

---

If you broke your bone from a fall, how high was it from?

- Above standing height (greater than 6 inches above standing)
- Standing height (within 5-6 inches from where head would be standing)
- Less than standing height (over 6 inches below where head would be if standing)

---

What is another bone that you have broken?  
(There will be separate questions for each broken bone)

- Face/Skull
- Rib/Sternum
- Collarbone (Clavicle)
- Arm (including upper arm, elbow, lower arm, wrist)
- Hand
- Fingers or Toes
- Hip/Pelvis
- Thigh
- Lower leg, ankle, foot
- Spine (Vertebrae)
- Other
- Unknown

---

If you broke a different bone than listed, please list: \_\_\_\_\_

---

How old were you when you broke this bone (years)? \_\_\_\_\_

---

How did you break this bone?

- Fall (please choose this for any type of fall and there will be a question with additional details below)
- High impact injury (example: motor vehicle accident)
- During activity (examples: bicycling, skateboarding, playing a sport)
- Injury unknown (incidentally detected fracture)
- Other

---

If you broke it an alternate way, how did you break this bone?

\_\_\_\_\_

---

If you broke your bone from a fall, how high was it from?

- Above standing height (greater than 6 inches above standing)
- Standing height (within 5-6 inches from where head would be standing)
- Less than standing height (over 6 inches below where head would be if standing)

---

What is another bone that you have broken?  
(There will be separate questions for each broken bone)

- Face/Skull
- Rib/Sternum
- Collarbone (Clavicle)
- Arm (including upper arm, elbow, lower arm, wrist)
- Hand
- Fingers or Toes
- Hip/Pelvis
- Thigh
- Lower leg, ankle, foot
- Spine (Vertebrae)
- Other
- Unknown

---

If you broke a different bone than listed, please list:

\_\_\_\_\_

---

How old were you when you broke this bone (years)?

\_\_\_\_\_

---

How did you break this bone?

- Fall (please choose this for any type of fall and there will be a question with additional details below)
- High impact injury (example: motor vehicle accident)
- During activity (examples: bicycling, skateboarding, playing a sport)
- Injury unknown (incidentally detected fracture)
- Other

---

If you broke it an alternate way, how did you break this bone?

\_\_\_\_\_

---

If you broke your bone from a fall, how high was it from?

- Above standing height (greater than 6 inches above standing)
- Standing height (within 5-6 inches from where head would be standing)
- Less than standing height (over 6 inches below where head would be if standing)

What is another bone that you have broken?  
(There will be separate questions for each broken bone)

- Face/Skull
- Rib/Sternum
- Collarbone (Clavicle)
- Arm (including upper arm, elbow, lower arm, wrist)
- Hand
- Fingers or Toes
- Hip/Pelvis
- Thigh
- Lower leg, ankle, foot
- Spine (Vertebrae)
- Other
- Unknown

If you broke a different bone than listed, please list:

\_\_\_\_\_

How old were you when you broke this bone (years)?

\_\_\_\_\_

How did you break this bone?

- Fall (please choose this for any type of fall and there will be a question with additional details below)
- High impact injury (example: motor vehicle accident)
- During activity (examples: bicycling, skateboarding, playing a sport)
- Injury unknown (incidentally detected fracture)
- Other

If you broke it an alternate way, how did you break this bone?

\_\_\_\_\_

If you broke your bone from a fall, how high was it from?

- Above standing height (greater than 6 inches above standing)
- Standing height (within 5-6 inches from where head would be standing)
- Less than standing height (over 6 inches below where head would be if standing)

What is another bone that you have broken?  
Check all additional that apply

- Face/Skull
- Rib/Sternum
- Collarbone (Clavicle)
- Arm (including upper arm, elbow, lower arm, wrist)
- Hand
- Fingers or Toes
- Hip/Pelvis
- Thigh
- Lower leg, ankle, foot
- Spine (Vertebrae)
- Other
- Unknown

How old were you when you broke these bones?  
If multiple, please list- for example, Arm (10), spine (42)

\_\_\_\_\_

How did you break these bones?  
If multiple, please list- for example, Arm (car accident), spine (fall)

\_\_\_\_\_

If you broke your bone from a fall, how high was it from?

- Above standing height (greater than 6 inches above standing)  
 Standing height (within 5-6 inches from where head would be standing)  
 Less than standing height (over 6 inches below where head would be if standing)

Do you currently use glucocorticoids (steroid medication)?

- Yes, currently  
 Yes, in the past but not currently  
 Never

Examples: hydrocortisone, prednisone, dexamethasone

Do you currently smoke tobacco products?

- Yes  
 No

Do you drink 3 or more alcoholic drinks per day?

- Yes  
 No

Do you take any of the following to improve bone health? Check all that apply.

- Vitamin D supplementation  
 Calcium supplementation  
 Increased calcium in diet  
 Multivitamin

Have you ever had a DXA scan to evaluate your bone density?

- Yes  
 No

If you had a DXA for low bone density, what were the results?

- I was told I have low bone density  
 I was told I have borderline low bone density  
 I was told I have normal bone density  
 I am not sure of the results

Have you ever been treated for low bone density?

- Yes  
 No

If you have been treated for low bone density, what was the treatment?

Check all that apply.

Bisphosphonates include: risendronate (Actonel, Atelvia), alendronate (Fosamax, Binosto), ibandronate (Boniva), zoledronic acid (Reclast, Zometa, Aclasta), pamidronate (Aredia), etidronate (Didronel)

- Calcium  
 Vitamin D  
 Bisphosphonates (names listed in question)  
 Denosumab (Xgeva, Prolia)  
 Teriparatide (Forteo) or abaloparatide (Tymlos)  
 Romosozumab (Evenity)  
 Selective estrogen receptor modulators: Rloxifene (Evista) or bazedoxifene (Conbriza, Viviant, Duavee, Duavive)  
 Estrogen (oral contraceptives, estrogen patches)  
 Calcitonin  
 Other

If you had an alternate treatment for low bone mineral density, what was it?

\_\_\_\_\_

Which age range are you in?

- under 12 years old  
 12 to 18 years old  
 over 18 years old

Please ensure this survey is filled out completely before clicking "submit".

Once you move to the next survey, you cannot return to this survey.

If you would like to return to this survey, please click "save and return".
